# Supplementary material for: The Prognostic Impact of Sarcopenia in Stage I to III Colon Cancer A Retrospective Study
Source: Research Square preprint supplement (doi:10.21203/rs.3.rs-8237628/v1), 2025-12-22

**Table S1.** Predictive performance of the two models for 1-, 3-, and 5-year survival

|  | AUC | 95%CI | Sensitivity | Specificity |
| --- | --- | --- | --- | --- |
| TNM-Sarcopenia model | | | | |
| 5 Year | 0.610 | 0.537 - 0.683 | 0.601 | 0.620 |
| 3 Year | 0.629 | 0.551 - 0.707 | 0.630 | 0.610 |
| 1 Year | 0.574 | 0.436 - 0.712 | 0.555 | 0.557 |
| TNM-model |  |  |  |  |
| 5 Year | 0.587 | 0.514 - 0.660 | 0.377 | 0.769 |
| 3 Year | 0.588 | 0.508 - 0.668 | 0.404 | 0.765 |
| 1 Year | 0.560 | 0.424 - 0.696 | 0.396 | 0.732 |

**Figure S1.** ROC analysis of the predictive ability of prediction models 1, 3, and 5 for survival


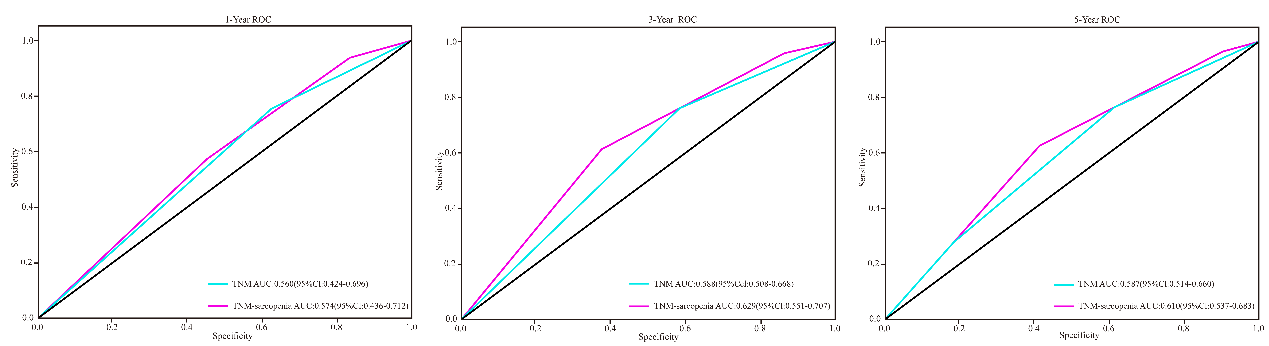

Supplement: Supplementary file 1 [file 04dac021b4c19551c6ab2c33.docx]
